# Supplementary material for: Health and ecological risk assessment and simulation of heavy metal-contaminated soil of Tehran landfill
Source: Royal Society of Chemistry journal article supplement (doi:10.1039/d0ra08833a), 2021-01-01
Supplement: d0ra08833a1.pdf [file d0ra08833a1.pdf]

(Supplementary information)

**Health and ecological risk assessment and simulation of heavy metal-contaminated soil of  
Tehran landfill**

Shahla Karimian<sup>1</sup>, Sakine Shekoohiyani<sup>\*1</sup>, Gholamreza Moussavi<sup>1</sup>

1: Department of Environmental Health Engineering, Faculty of Medical Sciences, Tarbiat  
Modares University, Tehran, Iran. E-mail: [s.shekoohiyani@modares.ac.ir](mailto:s.shekoohiyani@modares.ac.ir), Tel (+98) 21-82884865,  
Fax (+98) 21-82884580.

**List of Tables:**

**Table S1-** The values of factors that used in the carcinogenic and non-carcinogenic risk assessment.

**Table S2-** The values for SF (kg-day/mg) and R<sub>f</sub>D (mg/kg/day) in health risk calculation through different exposure routes.

**Table S3-** The concentration of heavy metals (mg/kg) in different sampling points in each season.

**Table S4-** Descriptive statistics of soil heavy metals concentrations (mg/kg) in all sampling point for four seasons

**Table S5-** The results for heavy metals normality test in different sampling points.

**Table S6-** The results for nonparametric test in different sampling points.

**Table S7-** The results for Kruskal-Wallis test for different sampling points.

**Table S8-** The results for heavy metal normality test in four seasons.

**Table S9-** The results for Mann-Whitney U test in four seasons.

**Table S10-** The results for Kruskal-Wallis test for four seasons.

**Table S11-** PCA rotated component matrix.

**Table S12-** Non-carcinogenic and carcinogenic health risk values from exposure routes in different landfill sampling points in four seasons.

**Table S13-** The comparison of carcinogenic values through investigated heavy metals in children and adults.

**Table S14-** Statistical values of Monte Carlo simulation for HI and ILCR in adults and children.

**List of Figures:**

**Fig. S1.** Heavy metals concentrations (mg/kg) in each season.

**Fig. S2.** The ecological risk indices, a) enrichment factor; b) individual potential risk factor; c) total ecological risk index

**Table S1-** The values of factors that used in the carcinogenic and non-carcinogenic risk assessment

| Parameters                       | Values                   |                         |                             |                         |              |            |
|----------------------------------|--------------------------|-------------------------|-----------------------------|-------------------------|--------------|------------|
|                                  | Symbol                   | Units                   | Children<br>(1-6 years old) | Adults                  | Distribution | Reference  |
| <b>Heavy metal concentration</b> | $C_{\text{soil}}$        | mg/kg                   |                             |                         | Log-normal   | This study |
| <b>Ingestion rate</b>            | IngR                     | mg/day                  | $24 \pm 4$                  | $100 \pm 1.7$           | Log-normal   | 1-3        |
| <b>Inhalation rate</b>           | InhR                     | m <sup>3</sup> /day     | $7.6 \pm 2.39$              | $20 \pm 1.27$           | Log-normal   | 1,2        |
| <b>Exposure frequency</b>        | EF                       | day/year                | 350 (180, 365)              | 350 (180, 365)          | Triangular   | 4,5        |
| <b>Exposure duration</b>         | ED                       | year                    | $6 \pm 2.39$                | $30 \pm 2.74$           | Log-normal   | 1,5        |
| <b>Conversion factor</b>         | CF                       | kg/mg                   | $1 \times 10^{-6}$          | $1 \times 10^{-6}$      | Point        |            |
| <b>Skin adherence factor</b>     | AF                       | mg/cm <sup>2</sup> /day | 0.2                         | 0.07                    | Point        | 1          |
| <b>Dermal absorption factor</b>  | ABS                      | unitless                | $1.0 \times 10^{-3}$        | $1.0 \times 10^{-3}$    | Point        | 6          |
| <b>Exposed skin area</b>         | SA                       | cm <sup>2</sup>         | $2800 \pm 1171$             | $5700 \pm 440$          | Log-normal   | 1          |
| <b>Particle emission factor</b>  | PEF                      | m <sup>3</sup> /kg      | $1.36 \times 10^9$          | $1.36 \times 10^9$      | Point        | 1          |
| <b>Average body weight</b>       | BW                       | kg                      | $15 \pm 1.5$                | $70 \pm 10.71$          | Log-normal   | 6,7        |
| <b>Average time</b>              | $AT_{\text{non-cancer}}$ | day                     | $ED \times 365 = 8760$      | $ED \times 365 = 8760$  | Point        | 23         |
|                                  | $AT_{\text{cancer}}$     | day                     | $70 \times 365 = 25500$     | $70 \times 365 = 25500$ | Point        | 23         |

**Table S2-** The values for SF (kg-day/mg) and R<sub>f</sub>D (mg/kg/day) in health risk calculation through different exposure routes <sup>19, 8, 9</sup>

| Factors            | Heavy metals |                      |                      |                      |                      |                      |                      |                      |                      |
|--------------------|--------------|----------------------|----------------------|----------------------|----------------------|----------------------|----------------------|----------------------|----------------------|
|                    | Zn           | Cu                   | Fe                   | Co                   | Ni                   | As                   | Cr                   | Pb                   | Cd                   |
| RfD <sub>ing</sub> | 0.3          | 4.0×10 <sup>-2</sup> | 0.70                 | 4.3×10 <sup>-2</sup> | 2.0×10 <sup>-2</sup> | 3.0×10 <sup>-4</sup> | 3.0×10 <sup>-3</sup> | 3.5×10 <sup>-3</sup> | 1.0×10 <sup>-3</sup> |
| RfD <sub>inh</sub> | 0.3          | 4.0×10 <sup>-2</sup> | 2.2×10 <sup>-4</sup> | 5.7×10 <sup>-6</sup> | 2.0×10 <sup>-2</sup> | 3.0×10 <sup>-4</sup> | 2.9×10 <sup>-5</sup> | 3.5×10 <sup>-3</sup> | 1.0×10 <sup>-3</sup> |
| RfD <sub>der</sub> | 0.3          | 4.0×10 <sup>-2</sup> | 4.5×10 <sup>-2</sup> | 1.6×10 <sup>-2</sup> | 8.0×10 <sup>-4</sup> | 3.0×10 <sup>-4</sup> | 6.0×10 <sup>-5</sup> | 5.3×10 <sup>-4</sup> | 1×10 <sup>-5</sup>   |
| SF <sub>ing</sub>  | ----         | ----                 | ----                 | ----                 | 1.7                  | 1.5                  | 0.5                  | 8.5×10 <sup>-3</sup> | 0.38                 |
| SF <sub>inh</sub>  | ----         | ----                 | ----                 | ----                 | 0.9                  | 15.1                 | 42.0                 | 4.2×10 <sup>-2</sup> | 6.3                  |
| SF <sub>der</sub>  | ----         | ----                 | ----                 | ----                 | 42.5                 | 1.5                  | 2.0                  | 8.5×10 <sup>-3</sup> | 0.38                 |

**Table S3-** The concentration of heavy metals (mg/kg) in different sampling points in each season

|        | Area        | Sampling point | As   | Cd   | Cr    | Mn   | Ni   | Pb    | Zn    | Cu    | Fe    | Co   | Al    |
|--------|-------------|----------------|------|------|-------|------|------|-------|-------|-------|-------|------|-------|
| Autumn | Landfill    | 1              | 5.8  | 0.25 | 68.5  | 1150 | 17.0 | 32.0  | 119.0 | 52.5  | 41100 | 15.0 | 69250 |
|        |             | 2              | 3.5  | 1.1  | 127.0 | 1400 | 30.5 | 55.0  | 253.0 | 113.5 | 31100 | 19.0 | 70350 |
|        |             | 3              | 12.0 | 0.24 | 90.0  | 1170 | 33.5 | 29.0  | 155.0 | 27.5  | 28950 | 10.5 | 50050 |
|        |             | 4              | 5.0  | 0.24 | 70.5  | 810  | 19.5 | 25.0  | 47.5  | 24.5  | 29750 | 11.5 | 68600 |
|        |             | 5              | 3.5  | 0.33 | 69.0  | 1050 | 30.5 | 30.0  | 58.5  | 34.0  | 42600 | 21.5 | 71000 |
|        |             | 6              | 5.5  | 0.5  | 128.0 | 950  | 37.5 | 150.0 | 355.5 | 224.5 | 41250 | 11.0 | 58950 |
|        |             | 7              | 6.0  | 0.5  | 75.0  | 1115 | 29.0 | 27.0  | 106.5 | 52.0  | 44950 | 22.5 | 73300 |
|        |             | 8              | 7.5  | 0.24 | 79.0  | 910  | 30.5 | 89.0  | 158.5 | 133.0 | 31000 | 11.0 | 62400 |
|        |             | 9              | 6.5  | 0.35 | 53.0  | 840  | 22.0 | 29.0  | 89.5  | 23.0  | 26650 | 10.0 | 60450 |
|        |             | 10             | 7.5  | 0.45 | 65.0  | 810  | 26.5 | 25.0  | 64.0  | 35.5  | 30300 | 9.0  | 58850 |
|        |             | 11             | 6.0  | 0.5  | 112.0 | 840  | 47.0 | 111.5 | 352.5 | 226.0 | 36750 | 9.5  | 56900 |
|        | Residential | 12             | 7.6  | 0.32 | 90.0  | 905  | 51.0 | 29.0  | 275.0 | 39.5  | 32050 | 12.5 | 65450 |
| Winter | Landfill    | 1              | 6.2  | 0.8  | 73.0  | 1097 | 25.0 | 39.0  | 114.0 | 64.0  | 44774 | 18.0 | 71293 |
|        |             | 2              | 3.9  | 1.2  | 131.0 | 1388 | 36.0 | 61.0  | 297.0 | 132.0 | 31137 | 23.0 | 72125 |
|        |             | 3              | 14   | 0.27 | 85.0  | 1129 | 39.0 | 33.0  | 134.0 | 40.0  | 31461 | 12.0 | 49213 |
|        |             | 4              | 5.3  | 0.23 | 65.0  | 868  | 22.0 | 20.0  | 66.0  | 45.0  | 37909 | 15.0 | 66192 |
|        |             | 5              | 3.8  | 0.27 | 64.0  | 1074 | 26.0 | 27.0  | 71.0  | 57.0  | 43202 | 18.0 | 73501 |
|        |             | 6              | 5.1  | 0.40 | 130.0 | 969  | 40.0 | 166.0 | 375.0 | 241.0 | 43134 | 16.0 | 60104 |
|        |             | 7              | 5.1  | 0.23 | 72.0  | 1128 | 24.0 | 32.0  | 76.0  | 56.0  | 46848 | 19.0 | 74494 |
|        |             | 8              | 7.0  | 0.31 | 78.0  | 880  | 35.0 | 78.0  | 213.0 | 112.0 | 33998 | 13.0 | 64714 |
|        |             | 9              | 7.7  | 0.26 | 57.0  | 828  | 28.0 | 34.0  | 97.0  | 40.0  | 28309 | 11.0 | 61534 |
|        |             | 10             | 6.4  | 0.25 | 62.0  | 800  | 29.0 | 29.0  | 78.0  | 39.0  | 32971 | 13.0 | 60528 |
|        |             | 11             | 5.6  | 0.39 | 115.0 | 878  | 43.0 | 117.0 | 408.0 | 206.0 | 37891 | 13.0 | 58710 |
|        | Residential | 12             | 8.0  | 0.27 | 81.0  | 940  | 49.0 | 34.0  | 85.0  | 35.0  | 34743 | 16.0 | 66843 |
| Spring | Landfill    | 1              | 8.0  | 0.27 | 69.0  | 1066 | 25.0 | 20.0  | 80.0  | 64.0  | 48285 | 18.0 | 72330 |
|        |             | 2              | 9.2  | 0.22 | 46.0  | 1170 | 21.0 | 15.0  | 63.0  | 62.0  | 41874 | 16.0 | 69629 |
|        |             | 3              | 9.8  | 0.23 | 74.0  | 778  | 41.0 | 20.0  | 92.0  | 48.0  | 33499 | 13.0 | 61778 |
|        |             | 4              | 9.4  | 0.23 | 58.0  | 750  | 22.0 | 13.0  | 61.0  | 47.0  | 36290 | 13.0 | 61832 |
|        |             | 5              | 4.9  | 0.24 | 62.0  | 1003 | 24.0 | 21.0  | 75.0  | 61.0  | 42734 | 16.0 | 71154 |
|        |             | 6              | 6.9  | 0.36 | 167.0 | 989  | 65.0 | 104.0 | 291.0 | 193.0 | 47160 | 17.0 | 63975 |
|        |             | 7              | 17.6 | 0.28 | 69.0  | 1093 | 32.0 | 19.0  | 88.0  | 56.0  | 34405 | 13.0 | 59397 |
|        |             | 8              | 12.0 | 0.26 | 68.0  | 813  | 35.0 | 29.0  | 107.0 | 76.0  | 32297 | 13.0 | 63116 |
|        |             | 9              | 4.6  | 0.23 | 59.0  | 984  | 26.0 | 13.0  | 67.0  | 64.0  | 44748 | 17.0 | 73907 |
|        |             | 10             | 14.5 | 0.23 | 63.0  | 728  | 38.0 | 19.0  | 77.0  | 41.0  | 29113 | 11.0 | 57373 |
|        |             | 11             | 10.8 | 0.23 | 56.0  | 872  | 22.0 | 14.0  | 65.0  | 51.0  | 41819 | 15.0 | 67486 |
|        | Residential | 12             | 15.1 | 0.25 | 69.0  | 733  | 42.0 | 19.0  | 71.0  | 38.0  | 30773 | 13.0 | 57661 |
| Summer | Landfill    | 1              | 4.3  | 0.37 | 79.0  | 1289 | 31.0 | 38.0  | 123.0 | 66.0  | 50242 | 17.0 | 78860 |
|        |             | 2              | 4.3  | 0.90 | 85.0  | 1054 | 23.0 | 47.0  | 216.0 | 101.0 | 38808 | 14.0 | 67955 |
|        |             | 3              | 7.8  | 0.29 | 81.0  | 1310 | 35.0 | 27.0  | 79.0  | 53.0  | 44464 | 15.0 | 71664 |
|        |             | 4              | 3.6  | 0.27 | 55.0  | 996  | 22.0 | 16.0  | 62.0  | 51.0  | 38941 | 13.0 | 65229 |
|        |             | 5              | 3.7  | 0.28 | 74.0  | 1172 | 24.0 | 25.0  | 68.0  | 58.0  | 46341 | 15.0 | 74916 |
|        |             | 6              | 3.9  | 0.27 | 85.0  | 1251 | 29.0 | 26.0  | 81.0  | 59.0  | 53911 | 18.0 | 80127 |
|        |             | 7              | 5.0  | 0.28 | 81.0  | 1141 | 28.0 | 22.0  | 71.0  | 49.0  | 45279 | 16.0 | 72401 |
|        |             | 8              | 4.2  | 0.33 | 85.0  | 920  | 33.0 | 51.0  | 160.0 | 153.0 | 33864 | 11.0 | 66751 |
|        |             | 9              | 6.5  | 0.27 | 215.0 | 916  | 31.0 | 39.0  | 109.0 | 83.0  | 30998 | 10.0 | 63447 |
|        |             | 10             | 4.2  | 0.28 | 72.0  | 856  | 33.0 | 34.0  | 90.0  | 60.0  | 29786 | 10.0 | 62276 |
|        |             | 11             | 6.3  | 0.29 | 68.0  | 1003 | 23.0 | 18.0  | 78.0  | 56.0  | 43260 | 15.0 | 73720 |
|        | Residential | 12             | 6.8  | 0.29 | 66.0  | 925  | 39.0 | 24.0  | 73.0  | 40.0  | 32583 | 12.0 | 62036 |

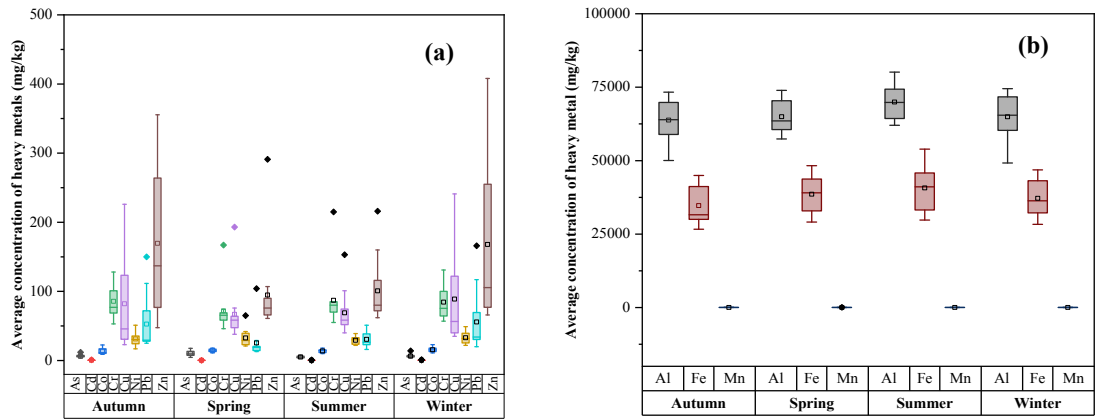

**Fig. S1.** Heavy metals concentrations (mg/kg) in each season

**Table S4-** Descriptive statistics of soil heavy metals concentrations (mg/kg) in all sampling point  
for four seasons

| <b>Element</b> | <b>Min</b> | <b>Max</b> | <b>Mean</b> | <b>Median</b> | <b>S.D</b> | <b>CV %</b> | <b>Background</b> | <b>World soil</b> |
|----------------|------------|------------|-------------|---------------|------------|-------------|-------------------|-------------------|
| As             | 3.9        | 3.9        | 6.8         | 6.7           | 2.6        | 38.3        | 6.1               | 6.0*              |
| Cr             | 62.1       | 62.1       | 82.7        | 77.0          | 20.3       | 24.6        | 23.4              | 70.0*             |
| Cd             | 0.24       | 0.24       | 0.36        | 0.29          | 0.12       | 32.9        | 0.34              | 0.35*             |
| Cu             | 41.9       | 41.9       | 38.9        | 52.9          | 29.3       | 75.2        | 13.6              | 30.0*             |
| Ni             | 21.4       | 21.4       | 30.3        | 29.9          | 5.7        | 18.9        | 11.3              | 50.0*             |
| Pb             | 18.5       | 18.5       | 42.5        | 28.0          | 19.4       | 45.7        | 10.2              | 35.0*             |
| Co             | 10.7       | 10.7       | 14.5        | 13.2          | 2.5        | 17.3        | 8.01              | 8.0*              |
| Zn             | 59.1       | 59.1       | 133.9       | 112.0         | 52.2       | 38.9        | 31.6              | 90.0*             |
| Mn             | 856.0      | 856.0      | 1005.4      | 969.0         | 98.1       | 9.7         | 792.9             | 1000.0*           |
| Al             | 58176.3    | 58176.3    | 66178.0     | 65148.9       | 5106.6     | 7.7         | 65000.0           | 71000.0*          |
| Fe             | 30542.5    | 30542.5    | 38276.2     | 35726.1       | 4363.7     | 11.4        | 24492.0           | 40000.0*          |

\* Average values of world soils <sup>10</sup>

**Table S5-** The results for heavy metal normality test in different sampling points

| Elements | Kolmogorov-Smirnov <sup>a</sup> | Shapiro-Wilk |
|----------|---------------------------------|--------------|
|          | Sig.                            | Sig.         |
| As       | 0.001                           | 0.000        |
| Cd       | 0.000                           | 0.000        |
| Cr       | 0.000                           | 0.000        |
| Cu       | 0.000                           | 0.000        |
| Co       | 0.004                           | 0.046        |
| Pb       | 0.000                           | 0.000        |
| Zn       | 0.000                           | 0.000        |
| Mn       | 0.000*                          | 0.000        |
| Fe       | 0.041                           | 0.028        |
| Ni       | 0.000*                          | 0.003        |
| Al       | 0.000*                          | 0.000        |

\*. This is a lower bound of the true significance.

a. Lilliefors Significance Correction



**Table S6-** The results for nonparametric test in different sampling points

| Parameters                     | As                 | Cd                 | Cr                 | Cu                 | Co                 | Pb                 | Zn                 | Mn                 | Fe                 | Ni                 | Al                 |
|--------------------------------|--------------------|--------------------|--------------------|--------------------|--------------------|--------------------|--------------------|--------------------|--------------------|--------------------|--------------------|
| Mann-Whitney U                 | 2.0                | 6.0                | 6.0                | 0.0                | 1.0                | 4.0                | 5.0                | 0.0                | 0.0                | 0.0                | 0.0                |
| Wilcoxon W                     | 12.0               | 16.0               | 16.0               | 10.0               | 11.0               | 14.0               | 15.0               | 10.0               | 10.0               | 10.0               | 10.0               |
| Z                              | -1.0               | 0.0                | 0.0                | -2.0               | -2.0               | -1.0               | 0.0                | -2.0               | -2.0               | -2.0               | -2.0               |
| Asymp. Sig. (2-tailed)         | 0.000              | 0.000              | 0.000              | 0.020              | 0.042              | 0.000              | 0.000              | 0.021              | 0.021              | 0.020              | 0.021              |
| Exact Sig. [2*(1-tailed Sig.)] | 0.000 <sup>b</sup> | 0.000 <sup>b</sup> | 0.000 <sup>b</sup> | 0.029 <sup>b</sup> | 0.057 <sup>b</sup> | 0.000 <sup>b</sup> | 0.000 <sup>b</sup> | 0.029 <sup>b</sup> | 0.029 <sup>b</sup> | 0.029 <sup>b</sup> | 0.029 <sup>b</sup> |

a. Grouping Variable: points

b. Not corrected for ties.

**Table S7-** The results for Kruskal-Wallis test for different sampling points

| Parameters  | As    | Cd    | Cr    | Cu    | Co    | Pb    | Zn    | Mn    | Fe    | Ni    | Al    |
|-------------|-------|-------|-------|-------|-------|-------|-------|-------|-------|-------|-------|
| Chi-Square  | 20.0  | 11.0  | 19.0  | 30.0  | 26.0  | 16.0  | 24.0  | 32.0  | 29.0  | 28.0  | 20.0  |
| Asymp. Sig. | 0.038 | 0.000 | 0.052 | 0.001 | 0.006 | 0.000 | 0.009 | 0.001 | 0.002 | 0.003 | 0.044 |

a. Kruskal Wallis Test

b. Grouping Variable: points

**Table S8-** The results for heavy metal normality test in four seasons

| Heavy metals | Season | Kolmogorov-Smirnov <sup>a</sup> | Shapiro-Wilk |
|--------------|--------|---------------------------------|--------------|
|              |        | Sig.                            | Sig.         |
| <b>As</b>    | Autumn | 0.000                           | 0.086        |
|              | Winter | 0.000                           | 0.007        |
|              | Spring | 0.000*                          | 0.000        |
|              | Summer | 0.008                           | 0.042        |
| <b>Cd</b>    | Autumn | 0.009                           | 0.001        |
|              | Winter | 0.000                           | 0.000        |
|              | Spring | 0.000                           | 0.002        |
|              | Summer | 0.000                           | 0.000        |
| <b>Cr</b>    | Autumn | 0.000*                          | 0.000        |
|              | Winter | 0.052                           | 0.021        |
|              | Spring | 0.000                           | 0.000        |
|              | Summer | 0.000                           | 0.000        |
| <b>Cu</b>    | Autumn | 0.001                           | 0.003        |
|              | Winter | 0.003                           | 0.004        |
|              | Spring | 0.000                           | 0.000        |
|              | Summer | 0.006                           | 0.003        |
| <b>Co</b>    | Autumn | 0.029                           | 0.015        |
|              | Winter | 0.000*                          | 0.000        |
|              | Spring | 0.020                           | 0.000        |
|              | Summer | 0.000*                          | 0.000        |
| <b>Pb</b>    | Autumn | 0.000                           | 0.001        |
|              | Winter | 0.002                           | 0.002        |
|              | Spring | 0.000                           | 0.000        |
|              | Summer | 0.000                           | 0.000        |
| <b>Zn</b>    | Autumn | 0.000                           | 0.082        |
|              | Winter | 0.014                           | 0.006        |
|              | Spring | 0.000                           | 0.000        |
|              | Summer | 0.024                           | 0.005        |
| <b>Mn</b>    | Autumn | 0.000*                          | 0.000        |
|              | Winter | 0.000*                          | 0.000        |
|              | Spring | 0.000*                          | 0.000        |
|              | Summer | 0.000*                          | 0.000        |
| <b>Fe</b>    | Autumn | 0.041                           | 0.000        |
|              | Winter | 0.000*                          | 0.000        |
|              | Spring | 0.000*                          | 0.000        |
|              | Summer | 0.000*                          | 0.000        |

---

|           |        |        |       |
|-----------|--------|--------|-------|
| <b>Ni</b> | Autumn | 0.000* | 0.000 |
|           | Winter | 0.000* | 0.000 |
|           | Spring | 0.000  | 0.024 |
|           | Summer | 0.000* | 0.000 |
| <b>Al</b> | Autumn | 0.000* | 0.000 |
|           | Winter | 0.000* | 0.000 |
|           | Spring | 0.000* | 0.000 |
|           | Summer | 0.000* | 0.000 |

---

\*. This is a lower bound of the true significance.

a. Lilliefors Significance Correction

**Table S9-** The results for Mann-Whitney U test in four seasons

| Parameters                     | As                 | Cd                 | Cr                 | Cu                 | Co                 | Pb                 | Zn                 | Mn                 | Fe                 | Ni                 | Al                 |
|--------------------------------|--------------------|--------------------|--------------------|--------------------|--------------------|--------------------|--------------------|--------------------|--------------------|--------------------|--------------------|
| Mann-Whitney U                 | 50.0               | 59.0               | 68.0               | 52.0               | 58.0               | 45.0               | 51.0               | 47.0               | 37.0               | 71.0               | 38.0               |
| Wilcoxon W                     | 128.0              | 137.0              | 146.0              | 130.0              | 136.0              | 123.0              | 129.0              | 125.0              | 115.0              | 149.0              | 116.0              |
| Z                              | -1.0               | 0.0                | 0.0                | -1.0               | 0.0                | -1.0               | -1.0               | -1.0               | -2.0               | -0.05              | -1.0               |
| Asymp. Sig. (2-tailed)         | 0.000              | 0.000              | 0.000              | 0.000              | 0.000              | 0.000              | 0.000              | 0.000              | 0.043              | 0.000              | 0.050              |
| Exact Sig. [2*(1-tailed Sig.)] | 0.000 <sup>b</sup> | 0.045 <sup>b</sup> | 0.000 <sup>b</sup> | 0.052 <sup>b</sup> |

a. Grouping Variable: Season

b. Not corrected for ties.

**Table S10-** The results for Kruskal-Wallis test for four seasons

| Parameters  | As    | Cd    | Cr    | Cu    | Co    | Pb    | Zn    | Mn    | Fe    | Ni    | Al    |
|-------------|-------|-------|-------|-------|-------|-------|-------|-------|-------|-------|-------|
| Chi-Square  | 14.0  | 12.0  | 6.0   | 1.0   | 4.0   | 16.0  | 5.0   | 5.0   | 5.0   | 0.0   | 5.0   |
| Asymp. Sig. | 0.002 | 0.006 | 0.072 | 0.000 | 0.000 | 0.001 | 0.000 | 0.000 | 0.000 | 0.000 | 0.000 |

a. Kruskal Wallis Test

b. Grouping Variable: Season

**Table S11-** PCA rotated component matrix

| <b>Variable</b>     | <b>PCA</b>   |              |              | <b>Communality</b> |
|---------------------|--------------|--------------|--------------|--------------------|
|                     | <b>1</b>     | <b>2</b>     | <b>3</b>     |                    |
| As                  | -0.198       | 0.678        | 0.148        | 0.521              |
| Cd                  | 0.317        | -0.055       | -0.872       | 0.864              |
| Cr                  | 0.737        | 0.010        | -0.277       | 0.620              |
| Mn                  | 0.049        | -0.531       | -0.371       | 0.721              |
| Ni                  | 0.648        | 0.282        | -0.035       | 0.501              |
| Pb                  | 0.951        | -0.050       | 0.035        | 0.908              |
| Zn                  | 0.928        | 0.045        | -0.216       | 0.910              |
| Cu                  | 0.943        | -0.139       | 0.002        | 0.908              |
| Fe                  | 0.017        | -0.908       | 0.117        | 0.839              |
| Co                  | -0.110       | -0.705       | -0.476       | 0.735              |
| Al                  | -0.297       | -0.870       | -0.201       | 0.885              |
| <b>% Var</b>        | <b>0.351</b> | <b>0.266</b> | <b>0.148</b> | <b>0.765</b>       |
| <b>Cumulative %</b> | <b>0.351</b> | <b>0.617</b> | <b>0.765</b> |                    |

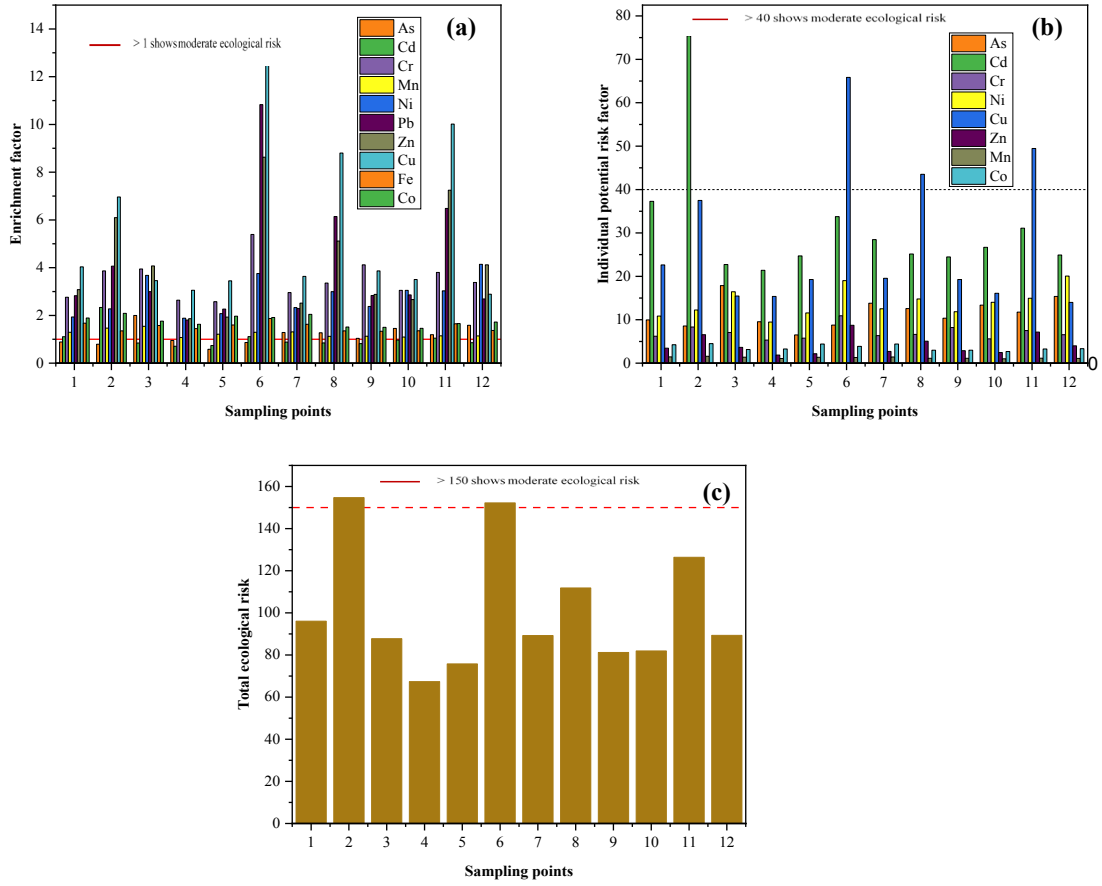

**Fig. S2.** The ecological risk indices, a) enrichment factor; b) individual potential risk factor; c) total ecological risk index

**Table S12-** Non-carcinogenic and carcinogenic health risk values from exposure routes in different landfill sampling points in four seasons

| Sampling points                   | HQ        |         |            | ILCR      |         |            |
|-----------------------------------|-----------|---------|------------|-----------|---------|------------|
|                                   | Ingestion | Dermal  | Inhalation | Ingestion | Dermal  | Inhalation |
| 1                                 | 1.3E-01   | 9.0E-03 | 4.9E-02    | 9.4E-05   | 7.5E-06 | 2.5E-07    |
| 2                                 | 1.1E-01   | 7.9E-03 | 3.8E-02    | 7.7E-05   | 5.7E-06 | 2.7E-07    |
| 3                                 | 1.2E-01   | 8.4E-03 | 4.3E-02    | 1.1E-04   | 8.5E-06 | 2.6E-07    |
| 4                                 | 1.0E-01   | 9.0E-03 | 3.8E-02    | 6.7E-05   | 5.3E-06 | 1.7E-07    |
| 5                                 | 1.2E-01   | 8.3E-03 | 4.5E-02    | 7.6E-05   | 5.9E-06 | 2.3E-07    |
| 6                                 | 1.3E-01   | 9.6E-03 | 5.3E-02    | 9.0E-05   | 7.1E-06 | 2.7E-07    |
| 7                                 | 1.2E-01   | 8.4E-03 | 4.4E-02    | 8.8E-05   | 6.8E-06 | 2.6E-07    |
| 8                                 | 1.0E-01   | 7.3E-03 | 3.3E-02    | 1.0E-04   | 8.0E-06 | 2.7E-07    |
| 9                                 | 1.2E-01   | 1.1E-03 | 3.1E-02    | 1.3E-04   | 8.0E-06 | 6.7E-07    |
| 10                                | 8.0E-02   | 6.6E-03 | 2.9E-02    | 9.7E-05   | 7.9E-06 | 2.3E-07    |
| 11                                | 1.1E-01   | 7.7E-03 | 4.2E-02    | 7.4E-05   | 5.6E-06 | 2.2E-07    |
| <b>Average</b>                    | 1.1E-01   | 8.2E-03 | 4.0E-02    | 1.1E-04   | 9.3E-06 | 2.2E-07    |
| <b>Ingestion/dermal ratio</b>     | 13.6      |         |            | 13.1      |         |            |
| <b>Ingestion/inhalation ratio</b> | 2.8       |         |            | 322.0     |         |            |

**Table S13-** The comparison of carcinogenic values through investigated heavy metals in children and adults

| Group           | CR values |         |         |         |         | ILCR    |
|-----------------|-----------|---------|---------|---------|---------|---------|
|                 | As        | Cd      | Cr      | Pb      | Ni      |         |
| <b>Adults</b>   | 6.6E-06   | 5.1E-08 | 1.8E-05 | 1.1E-07 | 1.2E-04 | 1.4E-04 |
| <b>Children</b> | 1.1E-05   | 1.5E-07 | 4.6E-05 | 3.9E-07 | 6.0E-05 | 1.2E-04 |

**Table S14-** Statistical values of Monte Carlo simulation for HI and ILCR in adults and children

| Groups          | HQ       |          |         |                | ILCR     |          |         |                |
|-----------------|----------|----------|---------|----------------|----------|----------|---------|----------------|
|                 | Skewness | Kurtosis | Mean    | Percentile 95% | Skewness | Kurtosis | Mean    | Percentile 95% |
| <b>Adults</b>   | 0.38     | 3.1      | 1.4E-01 | 1.8E-01        | 0.55     | 3.1      | 1.4E-04 | 1.8E-04        |
| <b>Children</b> | 0.47     | 3.1      | 8.9E-01 | 1.1E+00        | 0.64     | 3.6      | 1.2E-04 | 1.5E-04        |

**References:**

1. USEPA, *Supplemental guidance for developing soil screening levels for superfund sites, Appendix A- Generic SSLs for the residential and commercial/industrial scenarios*. 2002.
2. G. Harris, R. Van Horn, *Use of Monte Carlo methods in environmental risk assessments at the INEL: Applications and issues*. Lockheed Idaho Technologies Co.; 1996.
3. E. J. Stanek, E. J. Calabrese, and M. Zorn, *Hum. Ecol. Risk Assess.*, 2001, **7**, 357-68.
4. USEPA. *Supplemental guidance for developing soil screening levels for superfund sites*, Washington, DC, OSWER. 2001; 9355.
5. R. L. Smith, *Risk. Anal*, 1994, **14**, 433-439.
6. USEPA, *Exposure factors handbook*. Washington, DC. 1997; 20460.
7. M. Afiuni, *Guidance report of determine the maximum allowable pollution load for discharged pollutant resources to the soil*. Isfahan: Department of Environmental Protection Agency, 2013, 10-11.
8. D. G. Barnes, M. Dourson, P. Preuss, J. Bellin, C. Derosa, R. Engler, L. Erdreich, T. Farber, P. Fenner-Crisp, and E. Francis, *Regul. Toxicol. Pharmacol.*, 1988. **8**, 471-486
9. Y. Du, B. Gao, H. Zhou, X. Ju, H. Hao, and S. Yin, *Procedia. Environ. Sci.*, 2013, **18**, 299-309.
10. J. M. Martin, and M. Whitfield, *The significance of the river input of chemical elements to the ocean: Trace metals in sea water*, Springer, Boston, MA. 265-296.
